# Supplementary material for: A Novel Competitive Binding Screening Assay Reveals Sennoside B as a Potent Natural Product Inhibitor of TNF-α
Source: MDPI journal article supplement (doi:10.3390/biomedicines9091250), 2021-09-17
Supplement: s1 [file s1]

## Supplementary Materials

### A Novel competitive binding screening assay reveals sennoside B as a potent natural product inhibitor of TNF- $\alpha$

Lei Peng<sup>1</sup>, Prasannavenkatesh Durai<sup>2</sup>, Keunwan Park<sup>2</sup>, Jeong Joo Pyo<sup>3,\*</sup>, and Yongsoo Choi<sup>3,4,\*</sup>

- 1 School of Chemistry and Chemical Engineering, Qiqihar University, Qiqihar, Heilongjiang, China; 03555@qqhru.edu.cn (L.P.)
- 2 Natural Product Informatics Research Center, Korea Institute of Science and Technology (KIST), Gangneung 25451, Republic of Korea; prasanna@kist.re.kr (P.D.); keunwan@kist.re.kr (K.P.)
- 3 Natural Product Research Center, Korea Institute of Science and Technology (KIST), Gangneung 25451, Republic of Korea
- 4 Department of Biological Chemistry, University of Science and Technology, Daejeon 305-350, Republic of Korea

\*Correspondence: brianpyo@kist.re.kr (J.J.P.); yongsoo.choi@kist.re.kr (Y.C.)

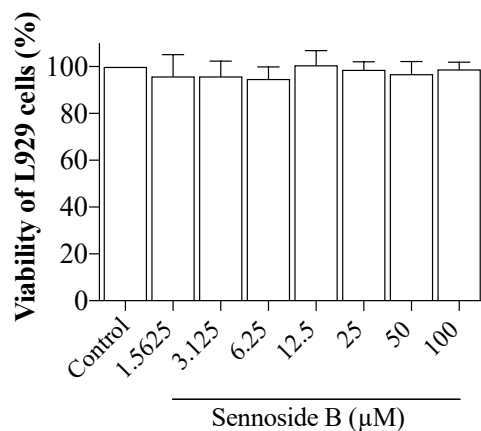

**Figure S1.** Effects of sennoside B on the cell viability of mouse L929 cells. L929 cells were seeded in 96-well plates at a density of  $2.0 \times 10^4$  cells/well and cultured overnight. Prepared DM EM containing different concentrations of sennoside B (1.56-100  $\mu$ M) was treated to the cells. After incubating for 18 h, cell viability was measured using the CCK-8 assay.

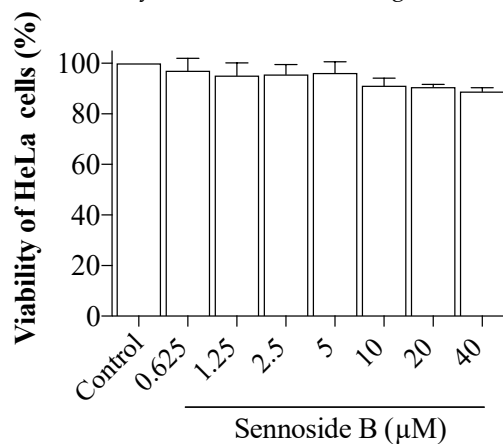

**Figure S2.** Effects of sennoside B on the cell viability of human HeLa cells. HeLa cells were seeded in 96-well plates at a density of  $2.0 \times 10^4$  cells/well and cultured overnight. Prepared DM MEM containing different concentrations of sennoside B (0.62-40  $\mu$ M) was treated to the cells. After incubating for 18 h, cell viability was measured using the CCK-8 assay.
